# Supplementary material for: Exploring of phytochemical constituents of Achillea arabica Kotschy. ethanolic flower extract by LC-MS/MS and its possible antioxidant and antidiabetic effects in diabetic rats
Source: Research Square preprint supplement (doi:10.21203/rs.3.rs-1207243/v2), 2022-03-28
Supplement: Supplementary file 1 [file 24ca3e57d44261b02ef235f5.docx]

**Highlights**

1. The *Achillea arabica* flower extract regulated the levels of glucose, biochemical and antioxidant parameters.
2. According to LC–MS/MS results of *A. arabica* flower extract, quinic acid, cyranoside, chlorogenic acid and cosmosin were determined as major compounds.
3. Two new compounds were determined in this plant according to NMR analyzes and these compounds were named edremitine and achillosine, respectively.
4. The *Achillea arabica* flower extract might have pharmaceutical-nutritional potential.
